# Supplementary material
Source: PubMed Central journal article supplement (PMC5823009)

**Supplementary Video 1. Nitrate stimulates dynamic  $\text{Ca}^{2+}$  increase in mesophyll protoplasts expressing GCaMP6.** Mesophyll protoplasts expressing GCaMP6 were treated with 10 mM  $\text{KNO}_3$ . The time-lapse video shows the representative GFP fluorescence signal changes in response to nitrate treatment using the Leica DM5000B microscope. The images are representative of 10 protoplasts. The images were acquired every two sec for 6 min and then made into a stack and converted to a video (7 frames/sec, 1 sec in the video equals to 12 sec in the recording).

**Supplementary Video 2. Nitrate stimulates dynamic  $\text{Ca}^{2+}$  increase in transgenic cotyledons expressing GCaMP6.** The cotyledon of a GCaMP6 transgenic seedling was treated with 10 mM  $\text{KNO}_3$ . The time-lapse video shows the representative GFP fluorescence signal changes in response to nitrate treatment using the Leica TCS NT SP1confocal microscope. The images are representative of 10 seedlings. The images were acquired every 10 sec for 8 min and then made into a stack and converted to a video (7 frames/sec, 1 sec in the video equals to 1 min in the recording).

**Supplementary Video 3. Nitrate stimulates dynamic  $\text{Ca}^{2+}$  increase in the transgenic root tip expressing GCaMP6.** The root tip of a GCaMP6 transgenic seedling was treated with 10 mM  $\text{KNO}_3$ . The time-lapse video shows the representative GFP fluorescence signal changes in response to nitrate treatment using the Leica TCS NT SP1confocal microscope. The images are representative of 10 seedlings. The images were acquired every 10 sec for 5 min and then made into a stack and converted to a video (7 frames/sec, 1 sec in the video equals to 1 minute in the recording).

**Supplementary Video 4. Nitrate stimulates dynamic  $\text{Ca}^{2+}$  increase in the transgenic root elongated region expressing GCaMP6.** The root elongated region of a GCaMP6 transgenic seedling was treated with 10 mM  $\text{KNO}_3$ . The time-lapse video shows the representative GFP fluorescence signal changes in response to nitrate treatment using the Leica TCS NT SP1 confocal microscope. The images are representative of 10 seedlings. The images were acquired every 10 sec for 5 min and then made into a stack and converted to a video (7 frames/sec, 1 sec in the video equals to 1 minute in the recording).

# Source Data

Figure 1h

|       | KCl |     |     | KNO <sub>3</sub> |      |      |
|-------|-----|-----|-----|------------------|------|------|
| Ctl   | 1.0 | 1.0 | 1.5 | 4.6              | 4.6  | 3.6  |
| CPK1  | 2.2 | 1.7 | 1.3 | 8.8              | 4.7  | 3.7  |
| CPK2  | 1.2 | 2.2 | 0.9 | 3.4              | 4.9  | 2.5  |
| CPK3  | 1.7 | 1.8 | 1.7 | 5.4              | 6.8  | 5.9  |
| CPK4  | 1.2 | 1.2 | 1.5 | 8.5              | 7.2  | 6.8  |
| CPK5  | 1.8 | 1.1 | 1.4 | 6.6              | 8.6  | 7.8  |
| CPK6  | 3.0 | 1.3 | 1.4 | 8.4              | 7.7  | 8.1  |
| CPK7  | 1.7 | 1.3 | 2.0 | 8.6              | 13.6 | 9.4  |
| CPK8  | 1.6 | 2.4 | 1.9 | 11.3             | 12.2 | 15.5 |
| CPK9  | 1.0 | 1.0 | 0.8 | 5.8              | 4.4  | 4.7  |
| CPK10 | 1.6 | 2.0 | 2.0 | 19.1             | 10.9 | 13.0 |
| CPK11 | 1.6 | 1.1 | 1.8 | 6.6              | 5.5  | 7.9  |
| CPK12 | 0.9 | 1.9 | 0.8 | 7.3              | 4.9  | 4.8  |
| CPK13 | 1.7 | 1.8 | 2.2 | 8.0              | 15.8 | 10.6 |
| CPK15 | 0.5 | 1.1 | 1.9 | 3.9              | 3.0  | 5.4  |
| CPK21 | 1.7 | 0.9 | 0.7 | 6.4              | 6.1  | 4.2  |
| CPK22 | 0.8 | 1.2 | 0.5 | 6.7              | 5.7  | 3.9  |
| CPK23 | 1.4 | 2.0 | 0.6 | 8.6              | 6.3  | 8.4  |
| CPK26 | 1.4 | 2.3 | 1.7 | 5.0              | 3.1  | 4.8  |
| CPK27 | 0.6 | 0.5 | 1.3 | 4.5              | 1.7  | 4.9  |
| CPK28 | 0.8 | 0.9 | 1.6 | 2.9              | 2.7  | 5.7  |
| CPK29 | 0.8 | 1.4 | 0.4 | 4.0              | 2.4  | 2.5  |
| CPK30 | 1.1 | 1.1 | 1.1 | 13.2             | 10.8 | 12.4 |
| CPK31 | 0.4 | 1.1 | 0.4 | 3.8              | 2.5  | 3.6  |
| CPK32 | 1.0 | 1.9 | 1.6 | 28.0             | 24.3 | 29.5 |
| CPK33 | 0.9 | 1.3 | 0.9 | 2.6              | 2.7  | 3.8  |

Figure 2g

|        | NIR  |      | G6PD3 |     |     | FNR2 |     |     |     |
|--------|------|------|-------|-----|-----|------|-----|-----|-----|
| WT K   | 1.2  | 1.0  | 0.8   | 0.9 | 1.1 | 1.0  | 0.9 | 1.1 | 1.0 |
| WT N   | 12.3 | 13.1 | 10.9  | 5.3 | 5.0 | 3.8  | 3.4 | 3.8 | 3.3 |
| icpk K | 1.1  | 0.8  | 0.9   | 1.2 | 0.8 | 0.9  | 0.7 | 0.8 | 0.7 |
| icpk N | 4.9  | 5.1  | 4.5   | 1.7 | 1.9 | 2.0  | 1.3 | 1.5 | 1.3 |

Extended Fig. 1d

|             | NRT1.1  |         | LHCB2.2 |         |         | UBQ10   |         |         |
|-------------|---------|---------|---------|---------|---------|---------|---------|---------|
| Root        | 9471    | 10310.0 |         | 128.0   | 131.0   | 10157.0 | 11580.0 |         |
| Shoot       | 8847    | 7252.0  |         | 12841.0 | 11238.0 | 10876.0 | 10402.0 |         |
| Mesophyll   |         |         |         |         |         |         |         |         |
| Protoplasts | 27202.9 | 26957.0 | 29725.8 | 13576.6 | 24899.5 | 25401.3 | 34083.4 | 35318.6 |

Extended Fig. 1e

|             | KCl |     | KNO <sub>3</sub> |      |      |      |
|-------------|-----|-----|------------------|------|------|------|
| Seedling    | 1.1 | 1.1 | 0.8              | 20.1 | 16.7 | 18.4 |
| Mesophyll   |     |     |                  |      |      |      |
| Protoplasts | 1.0 | 0.9 | 1.1              | 14.5 | 10.8 | 10.6 |

Extended Fig. 2a

|       | Cti K |     | Cti N |     |     | GdCl <sub>3</sub> K |     |     | GdCl <sub>3</sub> N |     |     |
|-------|-------|-----|-------|-----|-----|---------------------|-----|-----|---------------------|-----|-----|
| NIR   | 1.0   | 1.4 | 0.6   | 7.6 | 6.7 | 7.5                 | 0.5 | 0.6 | 0.5                 | 3.5 | 3.4 |
| G6PD3 | 1.0   | 1.1 | 0.9   | 5.4 | 4.9 | 5.4                 | 0.7 | 0.6 | 0.7                 | 2.3 | 2.1 |
| FNR2  | 1.1   | 1.1 | 0.8   | 3.1 | 2.8 | 2.9                 | 0.6 | 0.7 | 0.8                 | 1.5 | 1.3 |

  

|       | LaCl <sub>3</sub> K |     | LaCl <sub>3</sub> N |     |     |     |
|-------|---------------------|-----|---------------------|-----|-----|-----|
| NIR   | 0.8                 | 1.0 | 1.0                 | 2.5 | 3.1 | 2.6 |
| G6PD3 | 0.7                 | 0.7 | 0.8                 | 1.8 | 2.8 | 2.2 |
| FNR2  | 0.7                 | 0.8 | 0.7                 | 1.1 | 1.6 | 1.6 |

Extended Fig. 2b

|       | W5 K |     | W5 N |     |     | W7 K |     | W7 N |     |     |
|-------|------|-----|------|-----|-----|------|-----|------|-----|-----|
| NIR   | 1.1  | 1.1 | 0.8  | 6.5 | 6.4 | 5.7  | 0.6 | 0.3  | 0.3 | 2.6 |
| G6PD3 | 0.9  | 1.3 | 0.7  | 7.1 | 4.9 | 6.4  | 0.0 | 0.8  | 0.8 | 3.0 |
| FNR2  | 1.1  | 1.2 | 0.8  | 2.6 | 2.7 | 4.2  | 1.1 | 0.8  | 0.7 | 1.5 |

Extended Fig. 2d

|     | Sample |     |     |  |
|-----|--------|-----|-----|--|
| 0.5 | 1.3    | 1.3 | 1.2 |  |
| 1   | 1.2    | 1.1 | 1.1 |  |
| 2   | 3.3    | 3.1 | 2.7 |  |
| 3   | 2.1    | 2.4 | 3.0 |  |

Extended Fig. 2e

|                              | Sample |     |     |
|------------------------------|--------|-----|-----|
| KCl                          | 1.2    | 1.3 | 0.2 |
| NH <sub>4</sub> <sup>+</sup> | 2.0    | 1.6 | 0.8 |
| Gln                          | 0.7    | 1.3 | 0.6 |
| KNO <sub>3</sub>             | 3.3    | 6.2 | 3.9 |

Extended Fig. 2f

|     | KCl |     | KNO <sub>3</sub> |      |      |      |
|-----|-----|-----|------------------|------|------|------|
| 0.1 | 1.1 | 1.0 | 0.8              | 1.5  | 2.1  | 1.6  |
| 0.5 | 1.6 | 1.3 | 0.7              | 6.4  | 2.6  | 3.1  |
| 1   | 0.8 | 0.6 | 0.6              | 5.3  | 5.8  | 9.8  |
| 5   | 0.6 | 0.5 | 0.9              | 8.6  | 8.4  | 11.0 |
| 10  | 1.4 | 0.8 | 1.2              | 9.4  | 11.0 | 10.4 |
| 50  | 0.4 | 0.4 | 0.5              | 11.6 | 8.4  | 5.7  |

Extended Fig. 3d

|       | WK  |     | WN  |     |     | CPK7 K |     | CPK7 N |     |     |
|-------|-----|-----|-----|-----|-----|--------|-----|--------|-----|-----|
| NIR   | 0.9 | 1.0 | 1.1 | 8.0 | 8.6 | 8.9    | 1.1 | 1.4    | 1.1 | 8.9 |
| G6PD3 | 1.2 | 0.8 | 1.0 | 6.0 | 6.3 | 7.1    | 0.9 | 0.9    | 1.2 | 7.8 |

  

|       | CPK13 K |     | CPK13 N |     |     | CPK30 K |     | CPK30 N |     |     |
|-------|---------|-----|---------|-----|-----|---------|-----|---------|-----|-----|
| NIR   | 1.2     | 1.0 | 1.3     | 7.1 | 7.7 | 7.5     | 1.0 | 1.3     | 1.1 | 6.2 |
| G6PD3 | 0.9     | 0.9 | 1.0     | 5.4 | 5.8 | 5.9     | 0.9 | 1.0     | 0.9 | 5.3 |

  

|       | CPK8 K |     | CPK8 N |      |      | CPK10 K |     | CPK10 N |     |     |
|-------|--------|-----|--------|------|------|---------|-----|---------|-----|-----|
| NIR   | 1.1    | 0.9 | 1.4    | 10.0 | 10.1 | 8.4     | 1.0 | 1.1     | 1.2 | 7.6 |
| G6PD3 | 0.9    | 1.1 | 1.3    | 8.0  | 8.0  | 5.6     | 0.8 | 1.1     | 1.0 | 5.2 |

  

|       | CPK32 K |     | CPK32 N |     |     |     |
|-------|---------|-----|---------|-----|-----|-----|
| NIR   | 0.9     | 0.8 | 0.8     | 7.7 | 6.1 | 7.9 |
| G6PD3 | 1.1     | 1.1 | 0.9     | 6.2 | 5.0 | 6.2 |

Extended Fig. 3i

|       | WT K |     | WT N |     |     | cpk10,32 K |     | cpk10,32 N |     |     |
|-------|------|-----|------|-----|-----|------------|-----|------------|-----|-----|
| NIR   | 1.3  | 0.8 | 0.9  | 9.7 | 9.0 | 9.2        | 0.0 | 0.7        | 0.5 | 6.9 |
| G6PD3 | 1.1  | 0.9 | 1.0  | 6.4 | 5.0 | 5.4        | 0.2 | 0.7        | 0.7 | 4.4 |
| FNR2  | 1.1  | 1.0 | 0.9  | 3.4 | 3.9 | 3.4        | 0.1 | 1.0        | 0.7 | 1.8 |

  

|       | cpk30,32 K |     | cpk30,32 N |     |     |     |
|-------|------------|-----|------------|-----|-----|-----|
| NIR   | 0.9        | 0.8 | 0.8        | 5.9 | 6.1 | 7.4 |
| G6PD3 | 1.1        | 1.0 | 1.0        | 5.9 | 4.6 | 4.8 |
| FNR2  | 0.5        | 0.8 | 0.8        | 3.3 | 2.1 | 2.4 |

Extended Fig. 3j

|            | NIR  |      | G6PD3 |     |     | FNR2 |     |     |     |
|------------|------|------|-------|-----|-----|------|-----|-----|-----|
| WT K       | 1.2  | 1.0  | 0.8   | 0.9 | 1.1 | 1.0  | 0.9 | 1.1 | 1.0 |
| WT N       | 12.3 | 13.1 | 10.9  | 5.3 | 5.0 | 3.8  | 3.4 | 3.8 | 3.3 |
| cpk10,30 K | 0.8  | 0.9  | 0.7   | 0.6 | 0.7 | 0.7  | 0.7 | 0.8 | 0.7 |
| cpk10,30 N | 8.7  | 8.0  | 6.5   | 3.7 | 2.5 | 2.7  | 2.5 | 1.6 | 2.4 |

# Original gels/blots

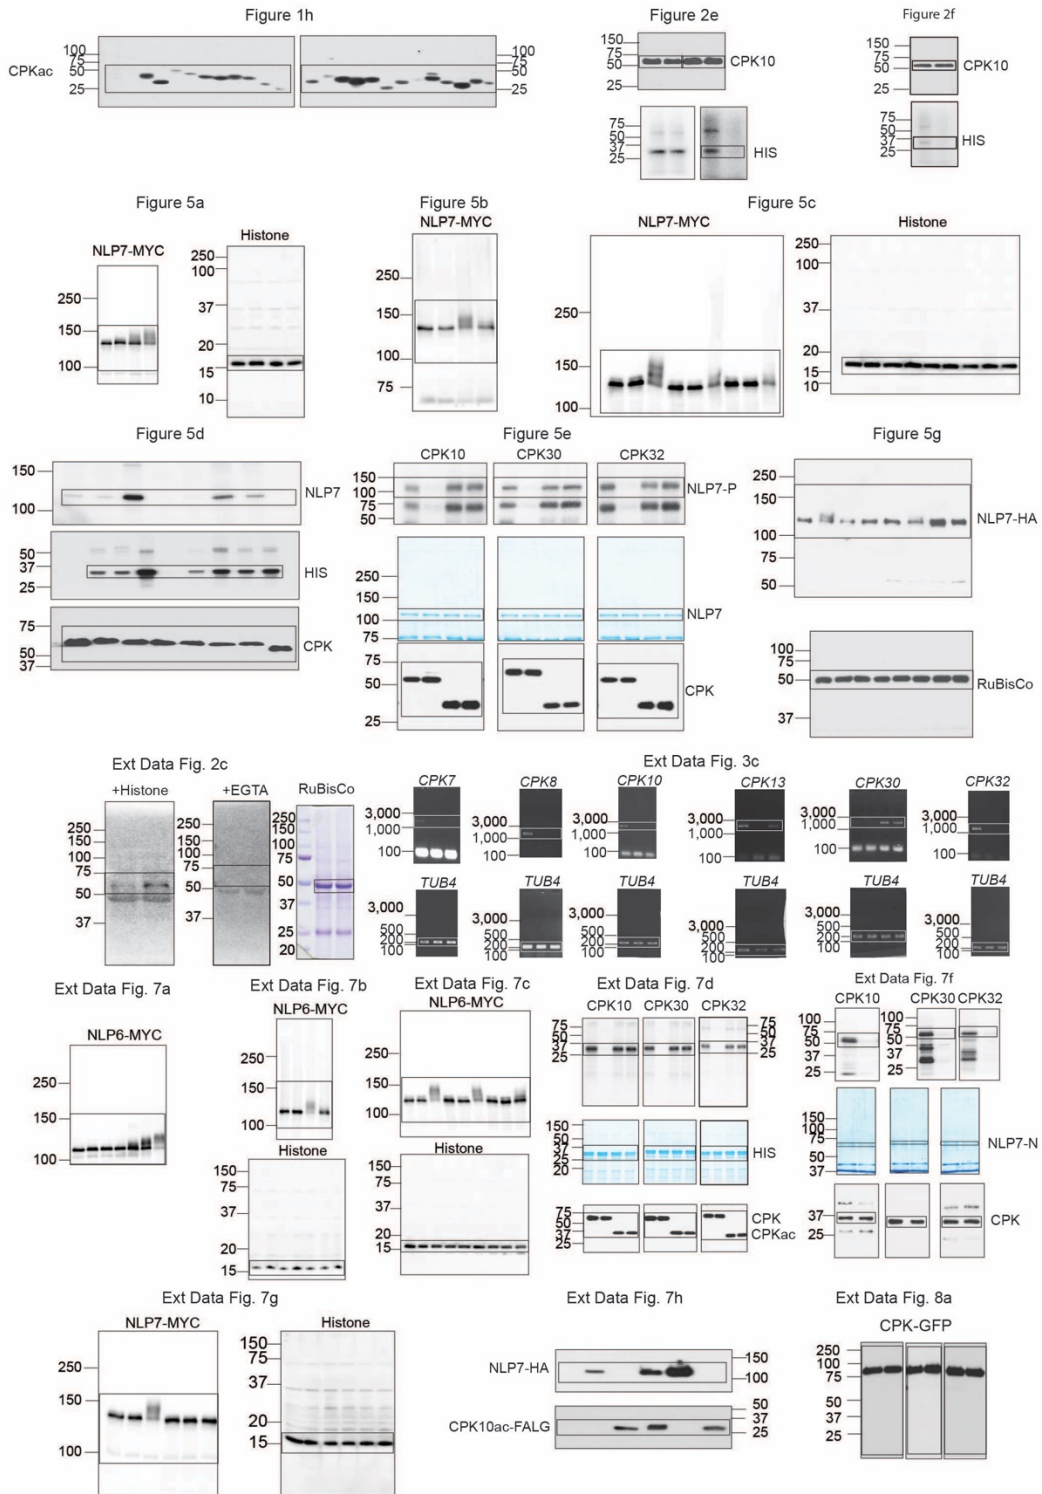

Supplement: NIHMS941498-supplement-SI.pdf [file NIHMS941498-supplement-SI.pdf]
